# Supplementary material for: Association Between Mode of First Delivery and Subsequent Fecundity and Fertility
Source: PubMed Central journal article supplement (PMC7171551; doi:10.1001/jamanetworkopen.2020.3076), 2020-04-20
Supplement: jamanetwopen-3-e203076-s001.pdf [file jamanetwopen-3-e203076-s001.pdf]

## Supplementary Online Content

Kjerulff KH, Paul IM, Weisman CS, et al. Association between mode of first delivery and subsequent fecundity and fertility. *JAMA Netw Open*. 2020;3(4):e203076. doi:10.1001/jamanetworkopen.2020.3076

**eMethods 1.** Sample Size and Power Calculations

**eMethods 2.** Ethical Approval, Inclusion and Exclusion Criteria, and Data Collection Procedures

**eMethods 3.** Description of Measurement of Study Variables

**eReferences.**

**eFigure.** Flow of Participants From Enrollment to the Analytic Cohort

**eTable 1.** Comparison of Two Vaginal and Two Cesarean Modes of Delivery on Main Outcomes (Conception and Live Birth)

**eTable 2.** Comparison of Women Who Were Lost to Follow-Up to Women Who Were Retained to the 36-Month Survey

**eTable 3.** Association of Baseline Characteristics and Loss to Follow-Up, Multivariable Analysis

**eTable 4.** Pre-exposure Covariates by Mode of First Delivery and Subsequent Conception Among Women Who Had Unprotected Intercourse Before First Conception or Resulting in No Conception

**eTable 5.** Concurrent-exposure Covariates by Mode of First Delivery and Subsequent Conception Among Women Who Had Unprotected Intercourse Before First Conception or Resulting in No Conception

This supplementary material has been provided by the authors to give readers additional information about their work.

## **eMethods 1. Sample Size and Power Calculations**

Based on analyses of birth certificate records of first births at gestational ages of 34 weeks or later among women aged 18 to 35 years old in Pennsylvania in 2000 matched to subsequent births to the end of 2004, we found that women whose first delivery was vaginal were more likely to have a subsequent delivery within 3 years (41.7%) than those whose first delivery was by cesarean (36.2%), yielding an age-adjusted odds ratio (OR) of 1.29 (95% CI, 1.28-1.31), and an effect size of 0.12 (small effect size). With a significance level of .05 (two-tailed) and a power of .80, the resulting required sample size for this study was 2404. Estimating an attrition rate of 20% over the course of the 36-month follow-up period yielded a minimum enrolled sample size of 3000 study participants.

## **eMethods 2. Ethical Approval, Inclusion and Exclusion Criteria, and Data Collection Procedures**

### **Ethical approval**

The study was approved by the institutional review board (IRB) of the Penn State University College of Medicine, as well as the IRBs of all hospitals and other institutions involved with participant recruitment. All participants provided signed informed consent.

### **Participants**

English and Spanish-speaking women with singleton pregnancies were recruited from prenatal hospital tours, hospital intranet postings, low-income clinics, newspaper ads, childbirth education classes and targeted mailings throughout Pennsylvania. Participants were limited to women aged 18 to 35 years at the time of study enrollment because women beginning childbearing in their later 30's are both more likely to deliver by cesarean and less likely to bear one or more subsequent children.<sup>18</sup> In addition, women were excluded if they delivered before 34 weeks gestation because women who deliver their first child before 34 weeks gestation are less likely to have a subsequent child.<sup>18</sup> Other exclusion criteria included a prior pregnancy of 20 weeks gestation or longer, surrogate pregnancy, plans to have the child adopted, and plans to have a tubal ligation during delivery. The 3006 participants in the FBS were significantly more likely to be white, married, over the age of 29, have private insurance and a college degree than women aged 18 to 35 years at first childbirth in the state of Pennsylvania as a whole, but were not significantly different in mode of delivery.<sup>24</sup> There were 68 women who were lost to follow-up after the baseline interview and 6 women who experienced stillbirth. These 74 women were replaced until we reached our target number of 3000 women who completed both the baseline and 1-month postpartum interviews. We over-enrolled slightly to achieve a sample size of 3006 women who completed both the baseline and 1-month postpartum interviews. Participants delivered at 76 hospitals in Pennsylvania and 2 participants delivered at hospitals in other states.

### **Data Collection**

The baseline interviews were conducted at 30 weeks gestation or later, at a mean (standard deviation (SD)) gestational age of 35.2 (1.6) weeks. Hospital discharge data and birth certificate data for the first childbirth were obtained, as well as birth certificate data for subsequent births that occurred during the 36-month follow-up period. The Pennsylvania Health Care Cost Containment Council (PHC4) used a multi-step process to link the hospital discharge data and birth certificate data to the interview data based on identifiers provided by the study participants, including the mother's first and last name, date of birth, date of delivery, hospital and social security number.

## **eMethods 3. Assessment of Exposure, Outcomes, and Covariates**

### **Exposure (Mode of Delivery at First Childbirth)**

Mode of delivery: In the 1-month interview women were asked “Did you have your baby vaginally or by cesarean section?” Maternal self-report of mode of delivery matched 100% with the diagnosis-related group (DRG) code recorded in the hospital discharge data for mode of delivery.

Planned versus unplanned cesarean: Women who reported that they delivered by cesarean section were then asked “Did you have a planned cesarean section that was scheduled to occur before you went into labor, that is, before regular contractions began, or did you have an unplanned cesarean delivery?” In addition, women were queried extensively about labor, including such questions as: “Were you in labor when you arrived at the hospital?”, “Did a doctor or nurse try to cause your labor to begin by the use of drugs or some other technique? This is often called trying to induce labor.” How long had you been in labor when you arrived at the hospital?”, “At some point did your contractions become regular and 5 minutes or less apart?”, “When you were in labor how painful was it for you during your contractions, before you received any type of pain medication?”, and “As best as you can remember, about how many hours was it from the time when you first had regular contractions until you delivered your baby?”. Among the 2423 women in this study, there were 127 women who reported that they delivered by planned cesarean delivery. For all 127 women their answers to the questions about labor supported their report that they had cesarean delivery before onset of labor. However, among the 585 women who reported that they had unplanned cesarean, we found 8 women who reported that they were not in labor at the time of hospital admission, were not induced, reported no hours in labor and no pain resulting from labor contractions. In addition, none of the indications for cesarean delivery for these 8 women were labor-related. Therefore we classified these women as having had planned cesarean delivery, for a total of 135 women who had planned cesarean delivery and 577 women who had unplanned cesarean.

Instrumental vaginal: Women were asked “During your labor and birth, did someone “Use forceps to help get the baby out?” and “During your labor and birth, did someone use a vacuum extractor to help get the baby out?” There were 213 women who reported instrumental delivery and an additional 4 women who did not report instrumental vaginal delivery, but instrumental vaginal delivery was reported in the birth certificate data, for a total of 217 women who were classified as having instrumental delivery.

Spontaneous vaginal: Women who reported that they delivered vaginally and were not found to have delivered instrumentally were classified as having had spontaneous vaginal delivery.

### **Outcome Variables (Measured During the 36-Month Follow-up Period)**

Conceived: At the 6, 12, 18, 24, 30 and 36-month data collection stages women were asked “Are you pregnant now?”, “How many times have you been pregnant since the previous interview?” and for each pregnancy since the previous interview “How did your first (second, third, etc) pregnancy end?” For each pregnancy women were asked how they knew for sure that they were pregnant, with response options of “Home pregnancy test”, “Doctor visit” and “Other”. If they answered “Other” they were asked to specify what the other way was. In the 36-month survey we included a section entitled “Pregnancy history recap”. In that section women were asked “Now I would like to review your pregnancy history since the birth of your first baby, 3 years ago, just to make sure we have gotten it right. Some of the questions will be the same as we asked before, except that this time we are asking about the entire past 3 years. Since the birth of your first baby about 3 years ago, have you had any pregnancies (including a current pregnancy)?” If they answered yes they were then asked: “How many times have you been pregnant total since the birth of your first child?” If women reported one or more pregnancies at the 6, 12, 18, 24, 30 or 36-month surveys that occurred by the end of the 36<sup>th</sup> month, or in response to the pregnancy history recap questions, they were classified as having conceived.

Number of conceptions: We counted the number of times that women reported a pregnancy at the 6, 12, 18, 24, 30 and 36-month surveys or in the pregnancy history recap questions that had occurred by the end of the 36<sup>th</sup> month. Each pregnancy was counted only once.

Pregnant for first time since birth of first child as of 36 months postpartum: Women who answered yes to the question “Are you pregnant now?” asked at the 36-month survey and had not reported any pregnancies in any of the previous surveys or the recap questions were classified as being pregnant for the first time as of the end of the 36<sup>th</sup> month after the birth of the first child.

Unprotected intercourse before first conception or resulting in no conception: At the 6, 12, 18, 24, 30 and 36-month surveys women were asked about sexual relations. The interviewer said “The next section concerns sexual relations. This is an important part of the study because researchers need to know how the health care that a woman receives at delivery and afterward affects sexual functioning and subsequent fertility.” “Since your last interview have you had sexual intercourse? If they answered “yes” they were then asked: “In each month since we last interviewed you, can you tell me approximately how many times you had intercourse? Let's begin with <M1>”. “Can you tell me how many times you had intercourse in <M1>?” “Can you tell me were there any times when you had sexual intercourse in <M1> without using any type of birth control or protection?” “How many times did you have sexual intercourse in <M1> without using any type of birth control or protection?” “What was the main form of birth control that you used in <M1>?” These questions were then repeated, covering each of the previous 6 months. At each interview women were asked if they were pregnant. If they answered yes they were asked “Were you using any type of birth control such as condoms, withdrawal, or birth control pills at the time your baby was conceived?” In the pregnancy history recap section of the 36-month survey women were asked: “Sometimes women have unprotected intercourse, that is, intercourse without using any type of birth control, even though they are not trying to become pregnant and are not already pregnant. Did you have unprotected intercourse when you were not really trying to become pregnant at any time since the birth of your first baby?” “Did any of the pregnancies that you mentioned above result from unprotected intercourse, even though you were not trying to become pregnant? How many of your pregnancies resulted from unprotected intercourse, even though you were not trying to become pregnant?” Women were considered to have had unprotected intercourse if they reported having unprotected intercourse in one or more months before first conception or resulting in no conception, or if they reported that they were not using birth control at the time of first conception, or if they reported having sexual relations in the months before first conception and reported that the main form of birth control they used was no birth control, or if they reported that they had unprotected intercourse before first conception or resulting in no conception in the recap questions. Women were considered to have had unprotected intercourse resulting in no conception if they reported having unprotected intercourse in one or more of the 36 months of follow-up and reported no conceptions. If they reported only one month of unprotected intercourse we did not count it if it occurred in months 35 or 36 because it would have been too soon to determine if they did not conceive as of the 36-month survey. Some women reported having unprotected intercourse in one or more months before first conception for as many as 10 months, but reported that at the time they conceived they were using birth control. These women were classified as having conceived after unprotected intercourse.

Months of unprotected intercourse: We counted the number of months of unprotected intercourse women reported in the previous 6 months at the 6, 12, 18, 24, 30 and 36-month surveys. Some women reported no months of unprotected intercourse in the 6 to 36-month surveys, but reported 1 or more months of unprotected intercourse before first conception or resulting in no conception in the 36-month pregnancy history recap questions. In that case we used the number of months of unprotected intercourse reported in the recap questions. A small number of women (n = 25) reported having unprotected intercourse before first conception or resulting in no conception but did not report months of unprotected intercourse in the interviews or in the recap questions.

Used birth control consistently in months before first conception or no conception: Women who reported using birth control in each month before first conception or across all 36 months if no conception occurred, and reported

never having unprotected intercourse in any of the months before first conception or no conception, in the 6 to 36-month survey questions and the recap questions, were classified as using birth control consistently. We counted any type of method to prevent pregnancy as using birth control, including withdrawal and the rhythm method. There were 18 women who reported that they conceived their first pregnancy during the follow-up period while using birth control and had also reported no months of unprotected intercourse before that conception.

Trying to become pregnant: In the pregnancy history recap questions in the 36-month survey women were asked “For the first pregnancy after the birth of your first baby, were you trying to become pregnant when the baby was conceived?” Women who answered “yes” to this question were classified as trying to conceive their first pregnancy after the birth of the first child. Women were also asked “Have you tried to become pregnant at any time since the birth of your first child?” Women who had not conceived and answered yes to this question were classified as trying to conceive as well.

Number of miscarriages, stillbirths and abortions: Women were asked to report how each pregnancy they had reported since the previous interview ended, at the 6, 12, 18, 24, 30 and 36-month interviews, including the response options of miscarriage, stillbirth and abortion. In addition, women were asked to report how each pregnancy ended in the 36-month recap questions, in case any pregnancies were missed in the interviews.

One or more live births: In the 12, 18, 24, 30 and 36-month surveys women were asked detailed questions about each live birth that had occurred since the previous interview, including the date of birth, hospital, gender, gestational age, the labor and delivery process and the health of the new baby. In addition, women were asked about all pregnancies and the outcome of all pregnancies reported in the pregnancy history recap section of the 36-month survey. Women were classified as having had a live birth if they reported having a live birth in the interviews or the recap questions, as of the end of the 36<sup>th</sup> month. Birth certificate data were obtained for live births that occurred during the 36 months of follow-up, unless the women had moved out of state.

Number of live births: The number of live births reported in the interviews and recap questions were counted to obtain a total number of live births which occurred over the course of the 36-month follow-up period, as of the end of the 36<sup>th</sup> month.

Fertility counseling, testing or treatment: Women who reported being pregnant at any of the interviews were asked “Did you or your partner use any type of fertility advice, testing or treatment before you became pregnant?” In addition, at the 36-month survey women were asked if they had sought fertility advice, testing or treatment at any time since the birth of their first child. Women who reported having sought fertility advice, testing or treatment in any of the interviews were classified as having sought fertility advice, testing or treatment.

## **Pre-Exposure Covariates**

Age: As part of the screening process women were asked their age. Age was verified in relation to the age reported in the birth certificate data.

Race/Ethnicity: In the baseline interview women were asked “Do you consider yourself Hispanic or Latina?” and “Do you consider yourself primarily white or Caucasian, Black or African American, Asian, Native Hawaiian or Pacific Islander, American Indian or Alaskan Native, or something else?” If women did not answer one or both of these questions we obtained race/ethnicity information from the birth certificate data.

Education: In the baseline interview women were asked “What is the highest level of schooling you completed?” If they did not answer this question we obtained this information from the birth certificate data.

Insurance coverage at delivery: This information was obtained from the hospital discharge data. There were 12 women who were initially classified as self-pay in the discharge data. However, 11 of these 12 women reported at the 6 or 12-month survey that their delivery bills had been covered by Medicaid and were reclassified as insured by public insurance.

Poverty level: The US Census Bureau defines the official poverty level based on household income levels for each combination of the total number of people living in the household and the number of these people aged  $\geq 18$  years.<sup>1</sup> Income levels are updated annually for inflation. We used the official U.S. Census Bureau levels for poverty and categories of income related to poverty for 2009, 2010 and 2011, depending on the year the participant delivered her first child. Categories were based on the ratio of income to the poverty level. Participants were categorized as living in poverty if their family income was  $\leq 100\%$  of the federal poverty level (FPL), near poor if their family income was 101-200% of the FPL and not poor if their family income was above 200% of the FPL.<sup>1</sup>

Marital status: In the baseline interview women were asked “Are you married and living with your husband, not married but living with a partner, widowed, divorced, separated or never been married?”

Pre-pregnancy BMI: In the baseline interview women were asked “How tall are you in stocking feet?” and “How much did you weigh right before you became pregnant?” If women answered “don’t know” or refused to answer the later question, we obtained pre-pregnancy weight from the birth certificate data. Self-report of height and pre-pregnancy weight were compared to the values reported in the birth certificate data. Where there were discrepancies between self-report and birth certificate data we judged which value made most sense in light of the current weight women reported at the time of the baseline interview, weight reported at the time of delivery in the birth certificate data, and current weight reported at the time of the 1-month interview. Pre-pregnancy BMI was categorized as underweight ( $< 18.5 \text{ kg/m}^2$ ), normal weight ( $18.5\text{-}24.9 \text{ kg/m}^2$ ), overweight ( $25.0\text{-}29.9 \text{ kg/m}^2$ ), class 1 obese (30 to  $< 35 \text{ kg/m}^2$ ), class 2 obese ( $35\text{-}<40 \text{ kg/m}^2$ ) and class 3 obese  $\geq 40.0 \text{ kg/m}^2$ ).

Maternal height: In the baseline interview women were asked “How tall are you in stocking feet?”

Prior Miscarriages and Abortions: In the baseline interview women were asked “How many times have you been pregnant in your life counting your current pregnancy?” and how each prior pregnancy had ended, including miscarriages and abortions. Because women who had a pregnancy of 20 weeks or longer were excluded, none of the study participants would have had a prior stillbirth.

Smoker: In the baseline interview women were asked “During your current pregnancy have you smoked cigarettes every day, some days or not at all?” Women who answered “every day” or “some days” were classified as being a smoker.

Pregnancy intendedness: In the baseline interview women were asked “Thinking back to just before you got pregnant this time, how did you feel about becoming pregnant?” with response options of “You wanted to be pregnant sooner”, “You wanted to be pregnant later”, “you wanted to be pregnant then” and “You didn’t want to be pregnant then or at any time in the future”.<sup>2</sup> If women answered that they wanted to be pregnant later or never, they were classified as having an unintended pregnancy.

Conceived 1<sup>st</sup> child while trying to conceive: In the baseline interview women were asked “At the time you conceived were you trying to conceive?”

Time to conception of 1<sup>st</sup> child among those trying to conceive: Women who answered “yes” to the above question were then asked “How long did it take for you to become pregnant from the time that you began actively trying to conceive?” This variable was highly skewed, so it was organized into three categories, 1-5 months, 6-12 months and 13 or more months.

Time to conception of 1<sup>st</sup> child in four categories: The above two variables were combined into one variable for use in the multivariable models. The four categories were “Conceived 1<sup>st</sup> child not trying to conceive, 1-5 months, 6-12 months, and 13+ months.

Fertility advice/testing or treatment before first childbirth: In the baseline interview women were asked “Did you or your partner use any type of fertility advice, testing or treatment before you become pregnant?”

Plans to have another baby within 3 years: In the baseline interview women were asked a series of questions about plans for future childbearing, including “Do you have plans as to when you would like to have another baby after

you have this one?” and “If so, when do you plan to have another baby after this one?”, with response options of “Within a year”, “About 2 years”, “About 3 years”, “About 4 years”, “5 or more years”, and “don’t know”. Women who reported that they planned to have another baby within a year, 2 years or 3 years were classified as planning to have another baby within 3 years.

**Mode of delivery preference:** In the baseline interview women were asked “At this point would you prefer to have your baby by cesarean section or have a vaginal delivery?” Response options were “Vaginal”, “Cesarean” and “No preference”.<sup>3</sup>

**Fear of childbirth:** In the baseline interview women were administered the FBS-CAS (First Baby Study Childbirth Anticipation Scale),<sup>4</sup> and were asked to indicate the extent to which they had specific feelings about the upcoming delivery, using the rating scale of “Extremely”, “Quite a bit”, “Moderately”, “A Little” and “Not at all”. Women’s ratings of the extent to which they felt nervous, worried, fearful and terrified were summated to create a total score of fear of childbirth. The Cronbach’s alpha for this scale was 0.84. Total scores could range from 4 (no fear) to 20 (high fear). Total scores were classified into three categories: 4-8 (low fear), 9-12 (medium fear), and 13-20 (high fear).

**Depression during pregnancy:** As part of the baseline interview participants were administered the Edinburgh Depression Scale (EDS).<sup>5</sup> The EDS is a 10-item inventory which asks respondents to report how they have been feeling in the past week, with items such as “I have looked forward with enjoyment to things.” and “I have been so unhappy I have been crying.” Total scores could range from 0 (no depression) to 30 (high depression). The overall Cronbach’s alpha was 0.79. We used the cutoff score of 13 or above as indicative of likely depression.<sup>6</sup>

**Social support during pregnancy:** Social support was measured using a 5-item shortened version of the Medical Outcomes Study (MOS) Social Support Scale.<sup>7</sup> Total scores could range from 5 to 25, with higher scores indicating higher social support. The Cronbach’s alpha for this scale was 0.88. Total scores were classified into three categories of social support: 5-19 (low), 20-23 (medium), and 24-25 (high).

**Stress during pregnancy:** Stress was measured using a modified version of the Psychosocial Hassles Scale (PHS).<sup>8,9</sup> In the PHS respondents are asked to rate the degree of stress they have experienced during the pregnancy due to specific factors such as “Money worries like paying bills”. Based on pilot testing of the study questionnaires two of the items in the original version of the instrument exhibited poor corrected item-total correlations. These items were “Sexual, emotional or physical abuse” and “Problems with alcohol or drugs”. Based on focus group studies discussing common problems experienced during pregnancy we changed these items to “Fights with partner” and “Fights with other family members”. These new items worked well and exhibited good corrected item-total correlations. Total scores could range from 12 (no stress) to 48 (high stress). The overall Cronbach’s alpha for the scale was 0.76. Total scores were classified into three categories: 12-16 (low stress), 17-20 (medium stress), and 21-48 (high stress).

**Gestational weight gain:** In the 1-month postpartum interview women were asked “How much total weight had you gained during this pregnancy?” If they answered “don’t know” we obtained that information from the birth certificate data. Based on the 2009 Institute of Medicine guidelines,<sup>10</sup> which takes into account women’s pre-pregnancy BMI, women were categorized as gaining less than recommended, as recommended, or more than recommended.

**Hospitalized during pregnancy:** In the baseline interview women were asked “During this pregnancy have you been hospitalized for any reason?” In the 1-month postpartum interview women were asked a series of questions about hospitalizations since the baseline interview but before delivery, including “Were you admitted to the hospital?” and “Considering all hospitalizations, how many days total were you in the hospital in the time period after the first interview, but before you went to the hospital to have your baby?” Women who reported being hospitalized during pregnancy, before or after the baseline interview, were classified as having been hospitalized during pregnancy. This included women who were hospitalized during pregnancy before the onset of labor, such as for preeclampsia, and then delivered during that hospitalization.



The following pre-exposure conditions were measured primarily via the ICD-9 CM codes reported in the hospital discharge data, as described in Korst et al (2014).<sup>11</sup> Women were also classified as having each condition if it was reported in the birth certificate data or by maternal self-report. Following are the ICD-9 CM codes used to identify each condition.

Chronic and gestational hypertension and preeclampsia: ICD-9 codes 642.0-642.9, 401-405.9. In addition, women were classified as having one or more of these conditions if it was reported in the birth certificate data (prepregnancy hypertension, gestational hypertension or preeclampsia, or eclampsia) or by maternal self-report.

Chronic and gestational diabetes and abnormal glucose tolerance: ICD-9 codes 648.0, 648.8, 250-250.9. In addition women were categorized as having one or more of these conditions if pre-pregnancy diabetes or gestational diabetes were reported in the birth certificate data or by maternal self-report.

Antepartum bleeding or placental conditions: ICD-9 codes 641.00-641.92, 656.7-656.9. In addition, women were categorized as having these conditions if they self-reported antepartum bleeding or problems with the placenta as a pregnancy complication or condition leading to hospitalization during pregnancy.

Thyroid disorder: ICD-9 code 648.1.

Hydramnios/Oligohydramnios: ICD-9 codes 657.0-658.0. In addition, women were categorized as having these conditions if they self-reported having too much or too little amniotic fluid as a pregnancy complication or condition leading to hospitalization during pregnancy.

Soft tissue disorders including uterine fibroids and endometriosis: ICD-9 codes 654.0,1,4,5,6,7,9; 218.0, 617.0. In addition, women were categorized as having uterine fibroids or endometriosis if they reported in the baseline interview that they had been told by a doctor or nurse that they had uterine fibroids and/or endometriosis.

Fetal intrauterine growth restriction/slow fetal growth: ICD-9 codes 656.5 and 764.9.

Fetal distress/abnormalities in heart rate or rhythm: ICD-9 codes 656.3, 659.7.

Macrosomia: ICD-9 code 656.6.

Breech: ICD-9 code 652.2. In addition, women were categorized as breech if the fetal presentation reported in the birth certificate data was breech.

Other malpresentation: ICD-9 codes 652.0 (unstable lie), 652.3 (transverse or oblique presentation), 652.4 (face or brow presentation), 652.7 (prolapse arm), 652.8 (other specified malposition or malpresentation), 652.9 (unspecified malpresentation).

## **Concurrent Exposure Covariates**

Gestational age: To calculate gestational age in days we compared the delivery due date women reported in the baseline interview to the delivery date reported in the birth certificate data. This method was in agreement with the obstetrician estimated gestational age (within a week) reported in the birth certificate data for 87% of the births. When it was not in accordance we used the obstetrician estimated gestational age reported in the birth certificate data. We further verified gestational age in relation to the ICD-9 diagnostic codes indicating that the child was born pre-term or post-term. Although we also calculated gestational age based on the last menses date reported in the birth certificate data, this later method was generally not consistent with the other two methods of calculating gestational age.

Newborn birth weight: Newborn birth weight was obtained from the birth certificate data.

Newborn sex: In the 1-month survey women were asked “Did you have a boy or a girl?”

Maternal hospital stay > 5 days: The length of hospital stay for the mother was obtained from the hospital discharge data.

5 minute Apgar < 9: The 5-minute Apgar score was obtained from the birth certificate data.

Neonatal Intensive Care Unit (NICU) admission: Neonatal intensive care unit (NICU) admission was obtained from the birth certificate data.

Neonatal hospital stay > 5 days: The length of hospital stay for the newborn was obtained from the hospital discharge data.

The following concurrent-exposure conditions were measured primarily via the ICD-9 CM codes reported in the hospital discharge data, as described in Korst et al (2014).<sup>11</sup> Women were also classified as having each condition if it was reported in the birth certificate data or by maternal self-report. Following are the ICD-9 CM codes used to identify each condition.

Dystocia: ICD-9 codes 660.0-660.9 (except 660.7) for obstructed labor; 661.0-661.9 (except 661.3) for abnormality of forces of labor; and ICD-9 codes 662.0-662.2 for prolonged labor.

Cephalopelvic disproportion: ICD-9 codes 653.0-653.9.

Failed Induction: ICD-9 codes 659.0-659.1.

Failed vacuum or forceps: ICD-9 code 660.7.

Premature or prolonged rupture of membranes and/or amnionitis: ICD-9 codes of 658.1-658.9.

Umbilical cord complications: ICD-9 codes 663.0-663.9.

Perineal laceration, 3<sup>rd</sup> or 4<sup>th</sup> degree: ICD-9 codes 664.2, 664.3. In addition, women were classified as having this condition if third or fourth degree perineal laceration was reported in the birth certificate data.

Cesarean wound complications: ICD-9 code 674.1 (disruption of cesarean wound). In addition, in the 1-month interview women were asked a series of questions about health problems they had experienced since the delivery, including “infection at the site of cesarean incision”. Women who reported having had an infection at the site of the cesarean incision were classified as having a cesarean wound complication as well.

Fetal congenital anomalies: Newborns were classified as having a congenital anomaly if one or more of the following conditions were reported in the newborn ICD-9 codes: Anencephalus (740.0,1,2); Spina bifida (741); Certain congenital musculoskeletal deformities (754.00-754.89); Cleft palate and cleft lip (749.00-749.25); Chromosomal anomalies (758.0-758.9); Congenital anomalies of the cardiac septum (745.0-745.9); Congenital anomalies of the eye (743.0-743.9); Congenital anomalies of the respiratory system (748.0-748.9); Congenital anomalies of the urinary system (753.0-753.9); Congenital anomalies of the upper alimentary tract (750.03-750.9); Ichthyosis congenital (757.1); Other congenital anomalies of the digestive system (751.0-751.9); Other congenital anomalies of the heart (746.0-746.9, 747.0-747.4); Other congenital anomalies of the nervous system (742.0-742.5, 742.8-742.9); and Other and unspecified congenital anomalies (759.00-759.90).

## eReferences

1. US Census Bureau Poverty. <http://www/census.gov>. Accessed September 17, 2013.
2. Finer LB, Henshaw SK. Disparities in rates of unintended pregnancy In the United States, 1994 and 2001. *Perspect Sex Reprod Health*. 2006;38(2):90-96. doi:10.1363/3809006
3. Kjerulff KH, Attanasio LB, Edmonds JK, Repke JT. Mode of delivery preference among pregnant nulliparous women. *J Womens Health (Larchmt)*. November 2018. doi:10.1089/jwh.2018.6989
4. Elvander C, Cnattingius S, Kjerulff KH. Birth experience in women with low, intermediate or high levels of fear: Findings from the First Baby Study. *Birth*. 2013;40(4):289-296. doi:10.1111/birt.12065
5. Cox J, Chapman G, Murray D, Jones P. Validation of the Edinburgh Postnatal Depression Scale (EPDS) in non-postnatal women. *J Affect Disord*. 1996;39 (3):185-189. doi:10.1016/0165-0327(96)00008-0
6. Matthey S, Henshaw C, Elliott S, Barnett B. Variability in use of cut-off scores and formats on the Edinburgh Postnatal Depression Scale - Implications for clinical and research practice. *Arch Womens Ment Health*. 2006;9(6):309-315. doi:10.1007/s00737-006-0152-x
7. McCarrier K, Bushnell D, Martin M, Paczkowski R, Nelson D, Buesching D. Validation and psychometric evaluation of a 5-Item measure of perceived social support. *Value Heal*. 2011;14(3):A148. doi:10.1016/j.jval.2011.02.824
8. Misra DP, O'Campo P, Strobino D. Testing a sociomedical model for preterm delivery. *Paediatr Perinat Epidemiol*. 2001;15(2):110-122. doi:10.1046/j.1365-3016.2001.00333.x
9. Phelan AL, DiBenedetto MR, Paul IM, Zhu J, Kjerulff KH. Psychosocial stress during first pregnancy predicts infant health outcomes in the first postnatal year. *Matern Child Health J*. 2015;19(12):2587-2597. doi:10.1007/s10995-015-1777-z
10. IOM. *Weight Gain During Pregnancy: Reexamining the Guidelines*.; 2009. doi:10.1097/00006250-196901000-00025
11. Korst LM, Fridman M, Lu MC, et al. Monitoring childbirth morbidity using hospital discharge data: Further development and application of a composite measure. *Am J Obstet Gynecol*. 2014;211 (3):268.e1-268e16. doi:10.1016/j.ajog..2014.03.011
12. Ware J. *How to Score Version 2 of the SF-12 Health Survey*.; 2002. doi:10.1016/j.jpowsour.2008.01.091

eFigure. Flow of Participants from Enrollment to the Analytic Cohort

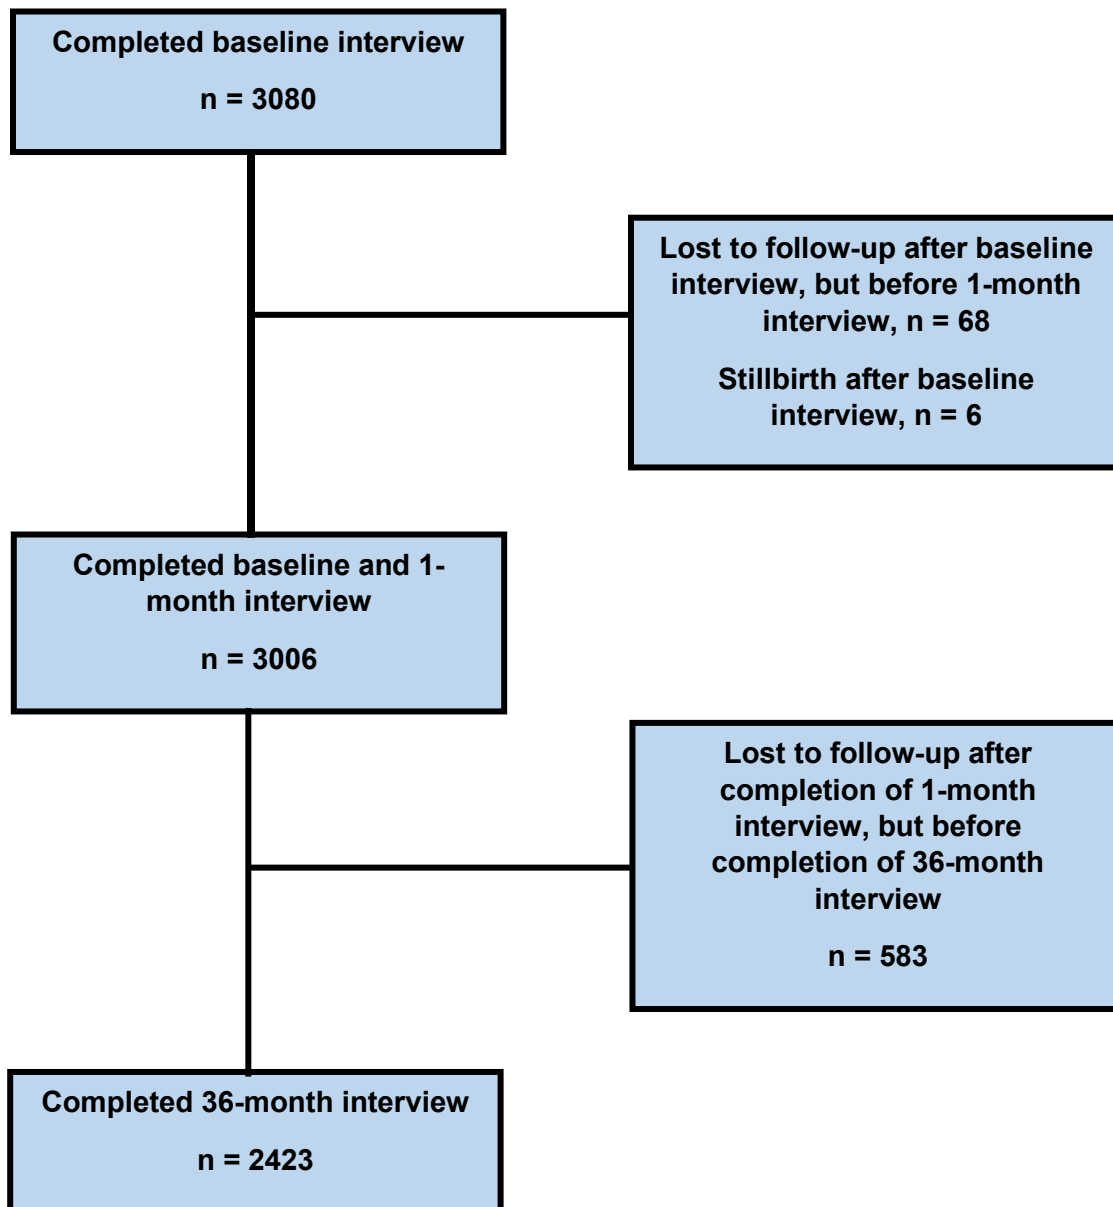

**eTable 1. Comparison of Two Vaginal and Two Cesarean Modes of Delivery<sup>a</sup>**

|                                 | <b>Conceived<sup>b</sup></b> | <b>P Value</b> | <b>Live birth<sup>c</sup></b> | <b>P Value</b> |
|---------------------------------|------------------------------|----------------|-------------------------------|----------------|
| Vaginal                         |                              | .07            |                               | .77            |
| Spontaneous, No./total No. (%)  | 962/1269 (75.8)              |                | 746/1494 (49.9)               |                |
| Instrumental, No./total No. (%) | 143/174 (82.2)               |                | 111/217 (51.2)                |                |
| Cesarean                        |                              | .38            |                               | .70            |
| Planned, No./total No. (%)      | 77/118 (65.3)                |                | 60/135 (44.4)                 |                |
| Unplanned, No./total No. (%)    | 338/485 (69.7)               |                | 245/577 (42.5)                |                |

<sup>a</sup>All results reported in this table are from  $\chi^2$  analyses.

<sup>b</sup>Among women who had unprotected intercourse before first conception or resulting in no conception (n = 2046).

<sup>c</sup>Among women who completed the 36-month survey (n = 2423).

**eTable 2. Comparison of Women Who Stayed in the Study (to the 36-Month Survey) to Those Who Were Lost to Follow-Up<sup>a</sup>**

| Variable                                                                    | Stayed in study<br>2423 (80.61%) | Lost to follow-up<br>583 (19.30%) | P Value |
|-----------------------------------------------------------------------------|----------------------------------|-----------------------------------|---------|
| Mode of delivery, No. (%)                                                   |                                  |                                   | .10     |
| Vaginal                                                                     | 1711 (70.6)                      | 432 (74.1)                        |         |
| Cesarean                                                                    | 712 (29.4)                       | 151 (25.9)                        |         |
| Maternal age, y, No. (%)                                                    |                                  |                                   | < .001  |
| 18-24                                                                       | 483 (19.9)                       | 328 (56.3)                        |         |
| 25-29                                                                       | 1041 (43.0)                      | 152 (26.1)                        |         |
| 30-35                                                                       | 899 (37.1)                       | 103 (17.7)                        |         |
| Race/ethnicity, No. (%)                                                     |                                  |                                   | < .001  |
| White, non-Hispanic                                                         | 2135 (88.1)                      | 367 (63.1)                        |         |
| Black, non-Hispanic                                                         | 107 (4.4)                        | 114 (19.6)                        |         |
| Hispanic                                                                    | 93 (3.8)                         | 73 (12.5)                         |         |
| Other                                                                       | 88 (3.6)                         | 28 (4.8)                          |         |
| Education, No. (%)                                                          |                                  |                                   | <.001   |
| High school degree or less                                                  | 273 (11.3)                       | 228 (39.1)                        |         |
| Some college or technical                                                   | 620 (25.6)                       | 184 (31.6)                        |         |
| College graduate                                                            | 1530 (63.1)                      | 171 (29.3)                        |         |
| Private insurance, No. (%)                                                  | 2029 (83.7)                      | 283 (48.7)                        | < .001  |
| Poverty level, No. (%)                                                      |                                  |                                   |         |
| Poverty                                                                     | 138 (5.7)                        | 117 (20.2)                        |         |
| Near poverty                                                                | 212 (8.8)                        | 128 (22.1)                        |         |
| Not poverty                                                                 | 2068 (85.5)                      | 335 (57.8)                        |         |
| Married, No. (%)                                                            | 1886 (77.8)                      | 231 (39.6)                        | <.001   |
| Pregnancy was intended, No. (%)                                             | 1755 (73.1)                      | 267 (46.5)                        | <.001   |
| Plan to have another baby within 3 years reported during pregnancy, No. (%) | 1520 (62.7)                      | 228 (39.1)                        | <.001   |

<sup>a</sup>All results reported in this table are from  $\chi^2$  analyses.

**eTable 3. Association between Baseline Characteristics and Loss to Follow-Up, Multivariable Analysis**

|                                                                    | Odds Ratio (95% CI) <sup>a</sup> | Wald P Value |
|--------------------------------------------------------------------|----------------------------------|--------------|
| Vaginal delivery                                                   | 1.16 (0.92-1.46)                 | .22          |
| Maternal age, y                                                    |                                  |              |
| 18-24                                                              | [Reference]                      |              |
| 25-29                                                              | 0.65 (0.48-0.87)                 | .004         |
| 30-35                                                              | 0.62 (0.43-0.88)                 | .008         |
| Race/ethnicity                                                     |                                  |              |
| White, non-Hispanic                                                | [Reference]                      |              |
| Black, non-Hispanic                                                | 2.07 (1.47-2.92)                 | <.001        |
| Hispanic                                                           | 2.04 (1.40-2.95)                 | <.001        |
| Other                                                              | 1.56 (0.96-2.52)                 | .07          |
| Education                                                          |                                  |              |
| High school degree or less                                         | [Reference]                      |              |
| Some college or technical                                          | 0.62 (0.47-0.82)                 | .001         |
| College graduate                                                   | 0.49 (0.35-0.69)                 | <.001        |
| Private insurance                                                  | 0.71 (0.53-0.96)                 | .03          |
| Poverty level                                                      |                                  |              |
| Poverty                                                            | [Reference]                      |              |
| Near poverty                                                       | 0.85 (0.59-1.22)                 | .38          |
| Not poverty                                                        | 0.80 (0.56-1.15)                 | .23          |
| Married                                                            | 0.62 (0.46-0.84)                 | .003         |
| Pregnancy was intended                                             | 0.89 (0.70-1.14)                 | .37          |
| Plan to have another baby within 3 years reported during pregnancy | 0.76 (0.61-0.95)                 | .01          |

<sup>a</sup>Logistic regression, all variables entered into one equation.

**eTable 4. Pre-Exposure Covariates by Mode of First Delivery and Subsequent Conception among Women who Had Unprotected Intercourse Before First Conception or Resulting in no Conception<sup>a, b</sup>**

|                                     | Mode of Delivery       |                        |         | Conceived          |                  |         |
|-------------------------------------|------------------------|------------------------|---------|--------------------|------------------|---------|
|                                     | Vaginal<br>1422 (70.4) | Cesarean<br>599 (29.6) | P Value | Yes<br>1503 (74.4) | No<br>518 (25.6) | P Value |
| Maternal age, y, No. (%)            |                        |                        | .006    |                    |                  | <.001   |
| 18-24                               | 277 (19.5)             | 84 (14.0)              |         | 236 (15.7)         | 125 (34.6)       |         |
| 25-29                               | 629 (44.2)             | 265 (44.2)             |         | 693 (46.1)         | 201 (38.8)       |         |
| 30-35                               | 516 (36.3)             | 250 (41.7)             |         | 574 (38.2)         | 192 (37.1)       |         |
| Race/ethnicity, No. (%)             |                        |                        | .54     |                    |                  | .001    |
| White non-Hispanic                  | 1274 (89.6)            | 524 (87.5)             |         | 1358 (90.4)        | 440 (84.9)       |         |
| Black non-Hispanic                  | 56 (3.9)               | 26 (4.3)               |         | 44 (2.9)           | 38 (7.3)         |         |
| Hispanic                            | 46 (3.2)               | 25 (4.2)               |         | 49 (3.3)           | 22 (4.2)         |         |
| Other                               | 46 (3.2)               | 24 (4.0)               |         | 52 (3.5)           | 18 (3.5)         |         |
| Education, No. (%)                  |                        |                        | .85     |                    |                  | <.001   |
| High school or less                 | 145 (10.2)             | 65 (10.9)              |         | 131 (8.7)          | 79 (15.3)        |         |
| Some college or technical           | 338 (23.8)             | 137 (22.9)             |         | 310 (20.6)         | 165 (31.9)       |         |
| College graduate                    | 939 (66.0)             | 397 (66.3)             |         | 1062 (70.7)        | 274 (52.9)       |         |
| Private insurance, No. (%)          | 1208 (85.0)            | 516 (86.1)             | .54     | 1333 (88.7)        | 391 (75.5)       | <.001   |
| Poverty level, No. (%) <sup>c</sup> |                        |                        | .97     |                    |                  | <.001   |
| Poverty                             | 75 (5.3)               | 30 (5.0)               |         | 79 (5.3)           | 26 (5.0)         |         |
| Near poverty                        | 110 (7.8)              | 47 (7.8)               |         | 84 (5.6)           | 73 (14.1)        |         |
| Not poverty                         | 1234 (87.0)            | 522 (87.1)             |         | 1339 (89.1)        | 417 (80.8)       |         |
| Married, No. (%)                    | 1149 (80.8)            | 482 (80.5)             | .85     | 1304 (86.8)        | 327 (63.1)       | <.001   |



**eTable 4. Pre-Exposure Covariates by Mode of First Delivery and Subsequent Conception among Women who Had Unprotected Intercourse Before First Conception or Resulting in no Conception<sup>a, b</sup> (continued)**

|                                                                                        | Mode of Delivery       |                        |                | Conceived          |                  |                |
|----------------------------------------------------------------------------------------|------------------------|------------------------|----------------|--------------------|------------------|----------------|
|                                                                                        | Vaginal<br>1422 (70.4) | Cesarean<br>599 (29.6) | <i>P</i> Value | Yes<br>1503 (74.4) | No<br>518 (25.6) | <i>P</i> Value |
| Pre-pregnancy BMI                                                                      |                        |                        | <.001          |                    |                  | <.001          |
| < 18.5                                                                                 | 46 (3.2)               | 11 (1.8)               |                | 46 (2.1)           | 11 (3.1)         |                |
| 18.5-24.9                                                                              | 837 (58.9)             | 271 (45.3)             |                | 864 (57.5)         | 244 (47.2)       |                |
| 25.0-29.9                                                                              | 302 (21.2)             | 145 (24.2)             |                | 325 (21.6)         | 122 (23.6)       |                |
| 30-34.9                                                                                | 145 (10.2)             | 77 (12.9)              |                | 155 (10.3)         | 67 (13.0)        |                |
| 35-39.9                                                                                | 51 (3.6)               | 55 (9.2)               |                | 68 (4.5)           | 38 (7.4)         |                |
| 40.0+                                                                                  | 41 (2.9)               | 39 (6.5)               |                | 45 (3.0)           | 35 (6.8)         |                |
| Conceived 1 <sup>st</sup> child while trying to conceive, No. (%)                      | 1016 (71.4)            | 432 (72.1)             | .79            | 1155 (76.8)        | 296 (57.1)       | <.001          |
| Time to conception of 1 <sup>st</sup> child among those who tried to conceive, No. (%) |                        |                        | .08            |                    |                  | <.001          |
| 1-5 months                                                                             | 694 (68.3)             | 273 (63.2)             |                | 792 (68.8)         | 175 (59.1)       |                |
| 6-12 months                                                                            | 193 (19.0)             | 86 (19.9)              |                | 219 (19.0)         | 60 (20.3)        |                |
| 13+ months                                                                             | 129 (12.7)             | 73 (16.9)              |                | 141 (20.6)         | 61 (20.6)        |                |
| Time to conception of 1st child in 4 categories, No. (%)                               |                        |                        | .153           |                    |                  | <.001          |
| Conceived 1 <sup>st</sup> child while not trying to conceive                           | 406 (28.6)             | 167 (27.9)             |                | 351 (23.4)         | 222 (42.9)       |                |
| 1-5 months                                                                             | 694 (48.8)             | 273 (45.6)             |                | 792 (52.7)         | 175 (33.8)       |                |
| 6-12 months                                                                            | 193 (13.6)             | 86 (14.4)              |                | 219 (14.6)         | 60 (11.6)        |                |
| 13+ months                                                                             | 129 (9.1)              | 73 (12.2)              |                | 141 (9.4)          | 61 (11.8)        |                |

**eTable 4. Pre-Exposure Covariates by Mode of First Delivery and Subsequent Conception among Women who Had Unprotected Intercourse Before First Conception or Resulting in no Conception<sup>a, b</sup> (continued)**

|                                                                          | Mode of Delivery       |                        |         | Conceived          |                  |         |
|--------------------------------------------------------------------------|------------------------|------------------------|---------|--------------------|------------------|---------|
|                                                                          | Vaginal<br>1422 (70.4) | Cesarean<br>599 (29.6) | P Value | Yes<br>1503 (74.4) | No<br>518 (25.6) | P Value |
| Gestational weight gain, No. (%) <sup>e</sup>                            |                        |                        | <.001   |                    |                  | .01     |
| Less than recommended                                                    | 174 (12.2)             | 48 (8.0)               |         | 162 (10.8)         | 60 (11.6)        |         |
| Recommended                                                              | 553 (38.9)             | 166 (27.8)             |         | 562 (37.4)         | 157 (30.3)       |         |
| More than recommended                                                    | 695 (48.9)             | 383 (64.2)             |         | 777 (51.8)         | 301 (58.1)       |         |
| Maternal height, inches, No. (%)                                         |                        |                        | <.001   |                    |                  | .35     |
| 53-62                                                                    | 233 (16.4)             | 158 (26.4)             |         | 283 (18.8)         | 108 (20.8)       |         |
| 63-65                                                                    | 556 (39.1)             | 224 (37.4)             |         | 593 (39.5)         | 187 (36.1)       |         |
| 66+                                                                      | 633 (44.5)             | 217 (36.2)             |         | 627 (41.7)         | 223 (43.1)       |         |
| Prior miscarriages, No. (%)                                              | 227 (16.0)             | 108 (18.0)             | .27     | 261 (17.4)         | 74 (14.3)        | .11     |
| Prior induced abortions, No. (%)                                         | 69 (4.9)               | 18 (3.0)               | .07     | 54 (3.6)           | 33 (6.4)         | .01     |
| Smoker, No. (%)                                                          | 104 (7.3)              | 40 (6.7)               | .64     | 89 (5.9)           | 55 (10.6)        | .00     |
| Fertility advice, testing or treatment, No. (%)                          | 177 (12.4)             | 102 (17.0)             | .01     | 209 (13.9)         | 70 (13.5)        | .88     |
| Pregnancy was intended, No. (%)                                          | 1068 (75.7)            | 450 (75.8)             | 1.00    | 1207 (81.0)        | 311 (60.4)       | <.001   |
| Edinburgh Depression Score $\geq$ 13, No. (%)                            | 43 (3.0)               | 23 (3.8)               | .34     | 43 (2.9)           | 23 (4.4)         | .09     |
| MOS Social Support, No. (%)                                              |                        |                        | .24     |                    |                  | .02     |
| Low (5-19)                                                               | 224 (15.8)             | 103 (17.2)             |         | 223 (14.9)         | 104 (20.1)       |         |
| Medium (20-23)                                                           | 606 (42.7)             | 271 (45.2)             |         | 656 (43.7)         | 221 (42.7)       |         |
| High (24-25)                                                             | 590 (41.5)             | 225 (37.6)             |         | 622 (41.4)         | 193 (37.3)       |         |
| PHS Stress, No. (%)                                                      |                        |                        | .90     |                    |                  | <.001   |
| Low (12-16)                                                              | 514 (36.2)             | 212 (35.2)             |         | 571 (38.0)         | 155 (30.0)       |         |
| Medium (17-20)                                                           | 558 (39.3)             | 234 (39.1)             |         | 592 (39.4)         | 200 (38.8)       |         |
| High (21-48)                                                             | 348 (24.5)             | 152 (25.4)             |         | 339 (22.6)         | 161 (31.2)       |         |
| Chronic and gestational hypertension and preeclampsia, No. (%)           | 167 (11.7)             | 100 (6.7)              | .003    | 187 (12.4)         | 80 (15.5)        | .08     |
| Chronic and gestational diabetes and abnormal glucose tolerance, No. (%) | 87 (6.1)               | 49 (8.2)               | .10     | 90 (6.0)           | 46 (8.9)         | .03     |
| Antepartum bleeding or placental conditions, No. (%)                     | 139 (9.8)              | 66 (11.0)              | .42     | 151 (10.0)         | 54 (10.4)        | .80     |

**eTable 4. Pre-Exposure Covariates by Mode of First Delivery and Subsequent Conception among Women who Had Unprotected Intercourse Before First Conception or Resulting in no Conception<sup>a, b</sup> (continued)**

|                                                   | Mode of Delivery       |                        |         | Conceived          |                  |         |
|---------------------------------------------------|------------------------|------------------------|---------|--------------------|------------------|---------|
|                                                   | Vaginal<br>1422 (70.4) | Cesarean<br>599 (29.6) | P Value | Yes<br>1503 (74.4) | No<br>518 (25.6) | P Value |
| Thyroid disorder, No. (%)                         | 40 (2.9)               | 30 (5.2)               | .02     | 55 (3.7)           | 15 (3.0)         | .49     |
| Hydramnios/Oligohydramnios, No. (%)               | 58 (4.1)               | 37 (6.2)               | .05     | 71 (4.7)           | 24 (4.6)         | 1.00    |
| Soft tissue disorders including uterine           | 28 (2.0)               | 34 (5.7)               | <.001   | 40 (2.7)           | 22 (4.2)         | .08     |
| Fetal intrauterine growth restriction/slow        | 47 (3.3)               | 20 (3.3)               | 1.00    | 51 (3.4)           | 16 (3.1)         | .89     |
| Fetal distress/abnormalities in heart rate or     | 249 (17.5)             | 194 (32.4)             | <.001   | 339 (22.6)         | 23.5 (20.1)      | .27     |
| Macrosomia, No. (%)                               | 17 (1.2)               | 54 (9.0)               | <.001   | 53 (3.5)           | 18 (3.5)         | 1.00    |
| Breech, No. (%)                                   | 8 (0.6)                | 78 (13.0)              | <.001   | 67 (4.5)           | 19 (3.7)         | .53     |
| Other malpresentation, No. (%)                    | 46 (3.2)               | 112 (18.7)             | <.001   | 114 (7.6)          | 44 (8.5)         | .51     |
| Hospitalized during pregnancy, No. (%)            | 219 (15.4)             | 118 (19.7)             | .02     | 232 (15.4)         | 105 (20.3)       | .01     |
| Mode of delivery preference, No. (%)              |                        |                        | <.001   |                    |                  | .28     |
| Cesarean                                          | 24 (1.7)               | 33 (5.5)               |         | 40 (2.7)           | 17 (3.3)         |         |
| Vaginal                                           | 1370 (96.4)            | 540 (90.2)             |         | 1427 (95.0)        | 483 (93.2)       |         |
| No preference                                     | 27 (1.9)               | 26 (4.3)               |         | 35 (2.3)           | 18 (3.5)         |         |
| Fear of childbirth, No. (%)                       |                        |                        | .61     |                    |                  | <.001   |
| Low (4-8)                                         | 491 (34.5)             | 194 (32.4)             |         | 537 (35.7)         | 148 (28.6)       |         |
| Medium (9-12)                                     | 614 (43.2)             | 263 (43.9)             |         | 659 (43.8)         | 218 (42.1)       |         |
| High (13-20)                                      | 317 (22.3)             | 142 (23.7)             |         | 307 (20.4)         | 152 (29.4)       |         |
| Plan to have another baby within 3 years, No. (%) | 955 (67.2)             | 387 (64.6)             | .28     | 1083 (72.1)        | 259 (50.0)       | <.001   |

Abbreviations: BMI, body mass index; MOS, Medical Outcomes Study; PHS, Psychosocial Hassles Scale.

<sup>a</sup>Among women who reported having unprotected intercourse before first conception or resulting in no conception and who reported months of unprotected intercourse (n = 2021).

<sup>b</sup>All results reported in this table are from  $\chi^2$  analyses.

<sup>c</sup>Poverty categories based on US Census Bureau: Poor, family income  $\leq$  100% of federal poverty level (FPL); Near poor, family income 101-200% of FPL; Not poor, family income above 200% of FPL.<sup>1c</sup>

<sup>d</sup>Calculated as weight in kilograms divided by height in meters squared.

<sup>e</sup>Based on IOM guidelines<sup>10</sup>

**eTable 5. Concurrent-Exposure Covariates by Mode of First Delivery and Subsequent Conception among Women who Had Unprotected Intercourse Before First Conception or Resulting in no Conception<sup>a, b</sup>**

|                                                                         | Mode of Delivery       |                        |         | Conceived          |                  |         |
|-------------------------------------------------------------------------|------------------------|------------------------|---------|--------------------|------------------|---------|
|                                                                         | Vaginal<br>1422 (70.4) | Cesarean<br>599 (29.6) | P Value | Yes<br>1503 (74.4) | No<br>518 (25.6) | P Value |
| Gestational age, No. (%)                                                |                        |                        | .03     |                    |                  | .23     |
| Preterm (34-36 weeks)                                                   | 55 (3.9)               | 23 (3.8)               |         | 51 (3.4)           | 27 (5.2)         |         |
| Early term (37-38 weeks)                                                | 268 (18.8)             | 111 (18.5)             |         | 288 (19.2)         | 91 (17.6)        |         |
| Full term (39-40 weeks)                                                 | 885 (62.2)             | 343 (57.3)             |         | 909 (60.5)         | 319 (61.6)       |         |
| Late term and postterm (41+ weeks)                                      | 214 (15.0)             | 122 (20.4)             |         | 255 (17.0)         | 81 (15.6)        |         |
| Newborn birth weight (grams), No. (%)                                   |                        |                        | <.001   |                    |                  | .92     |
| <2500 (underweight)                                                     | 34 (2.4)               | 20 (3.4)               |         | 39 (2.6)           | 15 (2.9)         |         |
| 2500-4000 (normal)                                                      | 1265 (89.5)            | 448 (75.8)             |         | 1277 (85.5)        | 436 (85.3)       |         |
| >4000 (macrosomic)                                                      | 115 (8.1)              | 123 (20.8)             |         | 178 (11.9)         | 60 (11.7)        |         |
| Male sex, No. (%)                                                       | 685 (48.2)             | 328 (54.8)             | .007    | 753 (50.1)         | 50.2)            | 1.00    |
| Dystocia, No. (%)                                                       | 156 (11.0)             | 269 (44.9)             | <.001   | 298 (19.8)         | 127 (24.5)       | .03     |
| Cephalopelvic disproportion, No. (%)                                    | 8 (0.6)                | 94 (15.7)              | <.001   | 71 (4.7)           | 31 (6.0)         | .29     |
| Failed induction, No. (%)                                               | 0                      | 47 (7.8)               | <.001   | 29 (1.9)           | 18 (3.5)         | .06     |
| Failed vacuum or forceps, No. (%)                                       | 0                      | 17 (2.8)               | <.001   | 13 (0.9)           | 4 (0.8)          | 1.00    |
| Premature or prolonged rupture of membranes and/or amnionitis, No. (%)  | 102 (7.2)              | 52 (8.7)               | .27     | 118 (7.9)          | 36 (6.9)         | .57     |
| Umbilical cord complications, No. (%)                                   | 450 (31.6)             | 116 (19.4)             | <.001   | 431 (28.7)         | 135 (26.1)       | .26     |
| Perineal laceration, 3 <sup>rd</sup> or 4 <sup>th</sup> degree, No. (%) | 128 (9.0)              | 0                      | <.001   | 99 (6.6)           | 29 (5.6)         | .47     |
| Cesarean wound complications, No. (%)                                   | 0                      | 60 (10.0)              | <.001   | 38 (2.5)           | 22 (4.2)         | .52     |
| Maternal hospital stay > 5 days, No. (%)                                | 4 (0.3)                | 24 (4.2)               | <.001   | 21 (1.4)           | 7 (1.4)          | 1.00    |

**eTable 5. Concurrent-Exposure Covariates by Mode of First Delivery and Subsequent Conception Among Women who Had Unprotected Intercourse Before First Conception or Resulting in no Conception<sup>a, b</sup> (continued)**

|                                                       | Mode of Delivery       |                        |                | Conceived          |                  |                |
|-------------------------------------------------------|------------------------|------------------------|----------------|--------------------|------------------|----------------|
|                                                       | Vaginal<br>1422 (70.4) | Cesarean<br>599 (29.6) | <i>P</i> Value | Yes<br>1503 (74.4) | No<br>518 (25.6) | <i>P</i> Value |
| Fetal congenital anomalies, No. (%)                   | 85 (6.0)               | 46 (7.7)               | .17            | 99 (6.6)           | 32 (6.2)         | .84            |
| 5 Minute Apgar < 9, No. (%)                           | 306 (21.6)             | 157 (26.7)             | .02            | 323 (21.6)         | 140 (27.6)       | .01            |
| Neonatal ICU (NICU) admission, No. (%)                | 63 (4.4)               | 36 (6.0)               | .14            | 72 (4.8)           | 27 (5.2)         | .72            |
| Neonatal Hospital length of stay of > 5 days, No. (%) | 34 (2.5)               | 18 (3.3)               | .35            | 39 (2.7)           | 13 (2.7)         | 1.00           |

Abbreviations: ICU, intensive care unit; NICU, neonatal intensive care unit.

<sup>a</sup>Among women who reported having unprotected intercourse before first conception or resulting in no conception and who reported months of unprotected intercourse (n = 2021).

<sup>b</sup>All results reported in this table are from  $\chi^2$  analyses.
